# Supplementary material for: Obscurin Rho GEF domains are phosphorylated by MST-family kinases but do not exhibit nucleotide exchange factor activity towards Rho GTPases in vitro
Source: PubMed Central journal article supplement (PMC10118190; doi:10.1371/journal.pone.0284453), 2023-04-20

**Fig 1C**

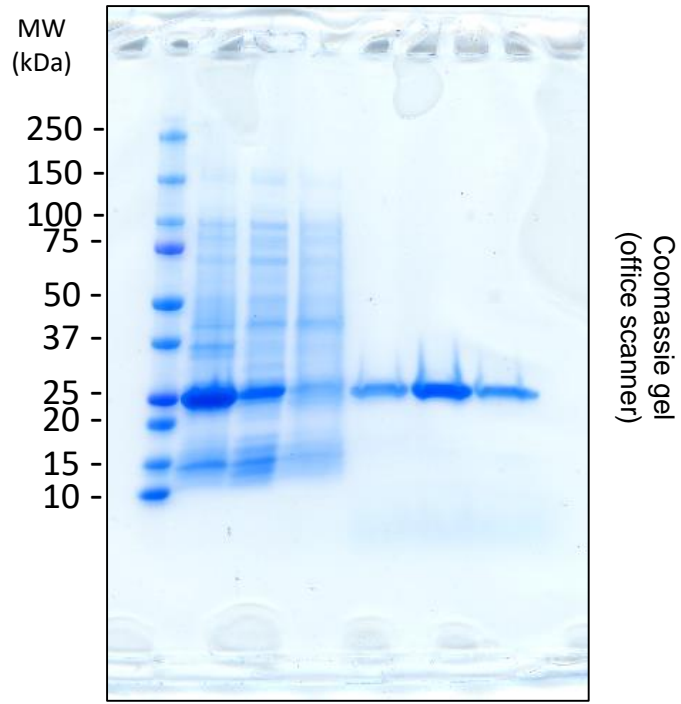

**Fig 4A**

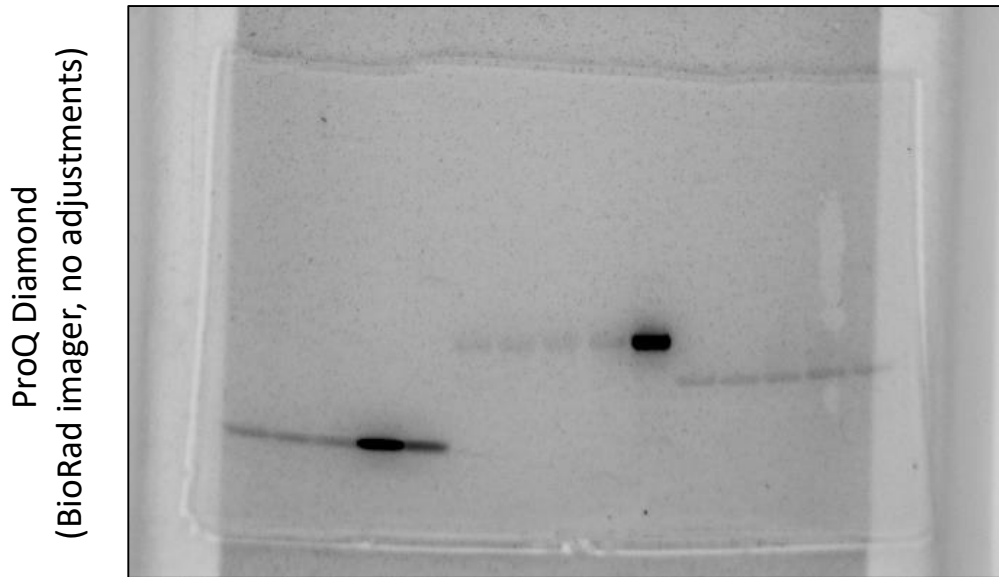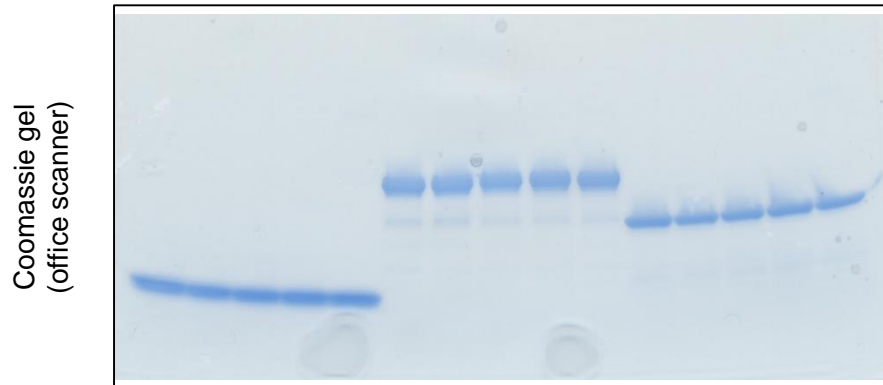

**Fig 4B**

**S13 Fig panel C**

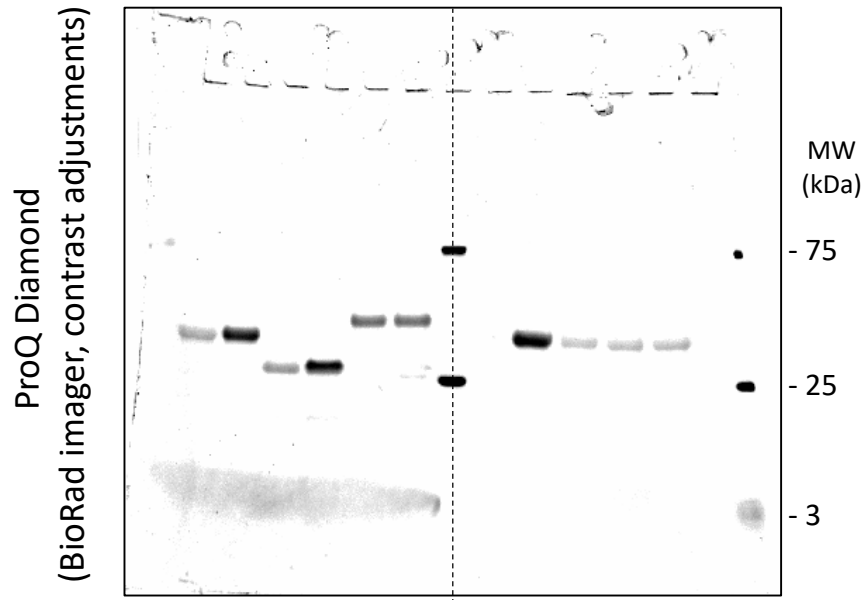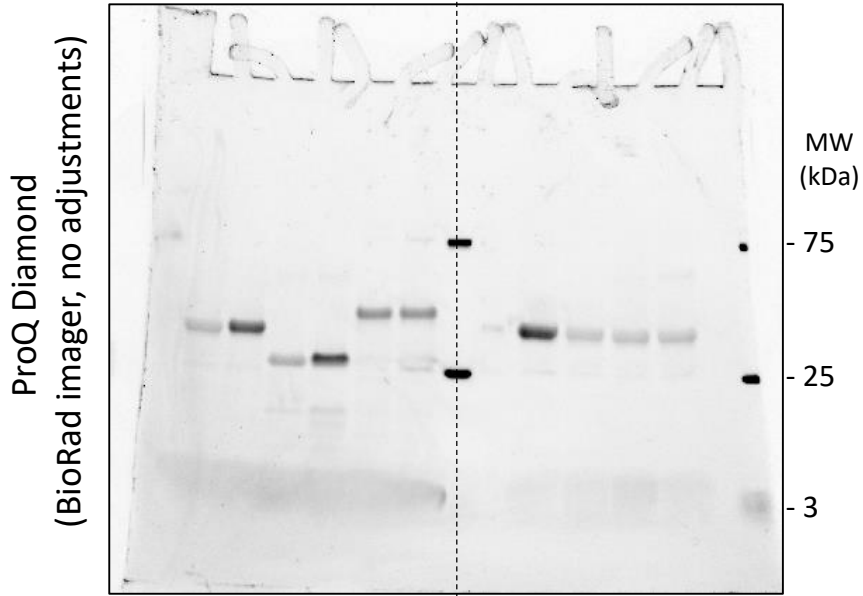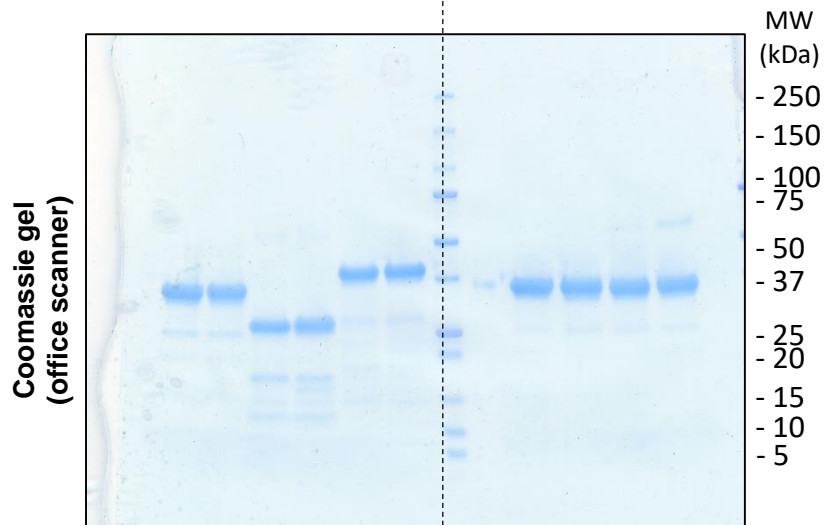

# S1 Fig

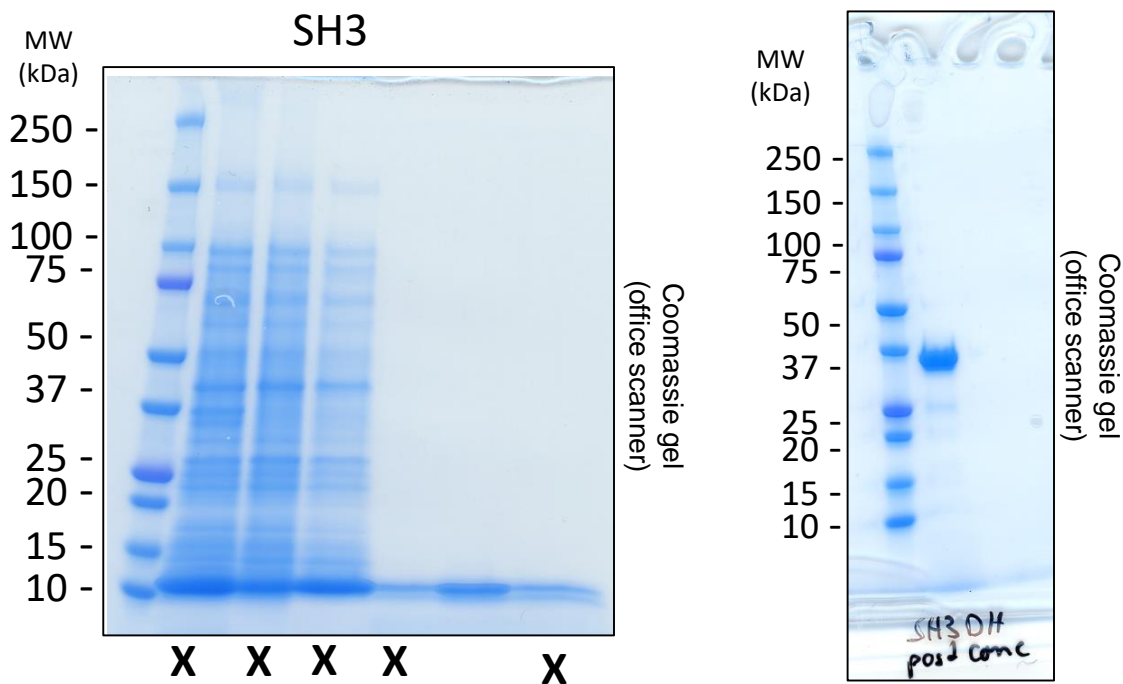

# S4 Fig

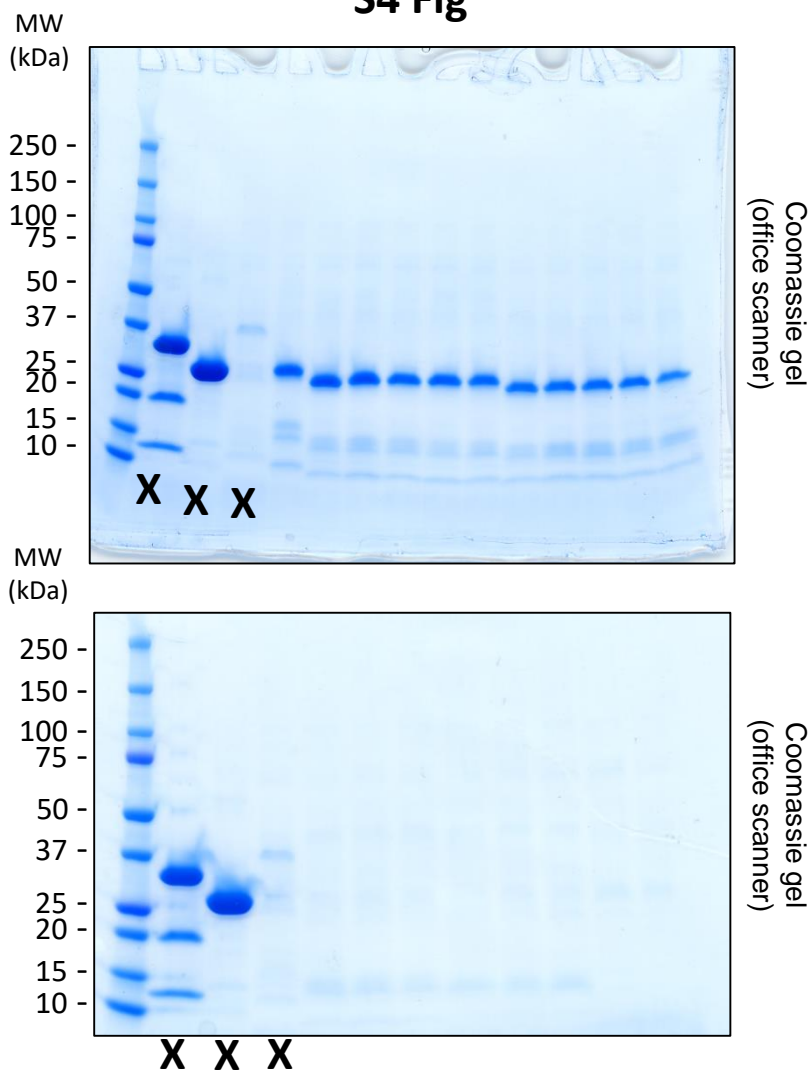

**S5 Fig**

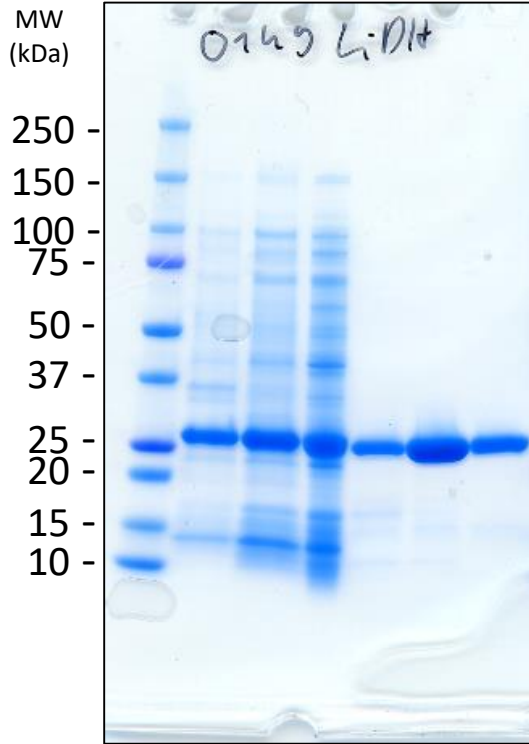

Coomassie gel  
(office scanner)

**S7 Fig**

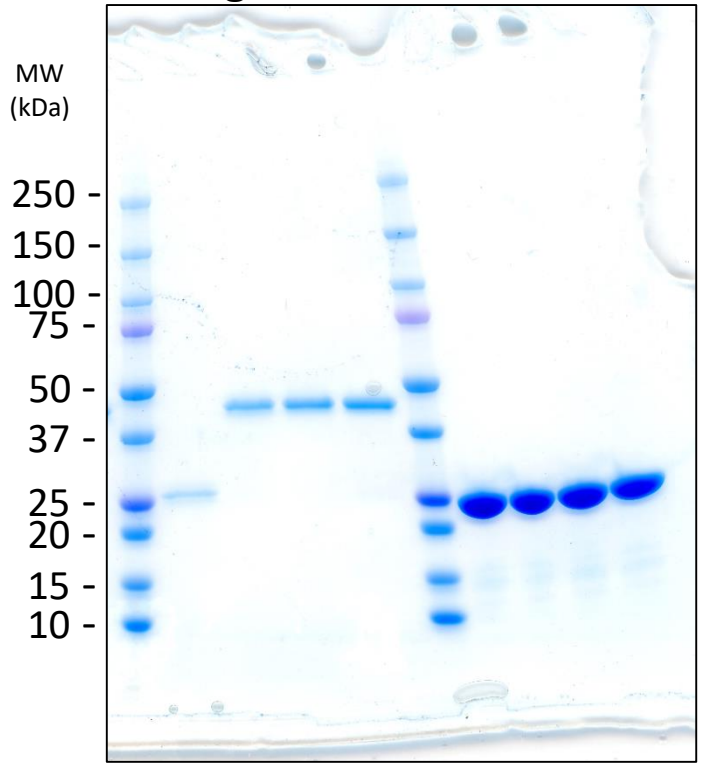

Coomassie gel  
(office scanner)

**S10 Fig, panel B**

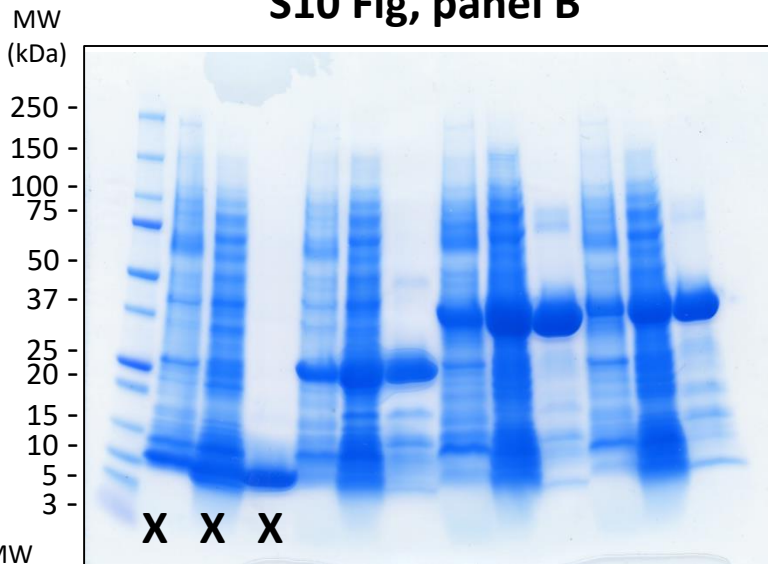

Coomassie gel  
(office scanner)

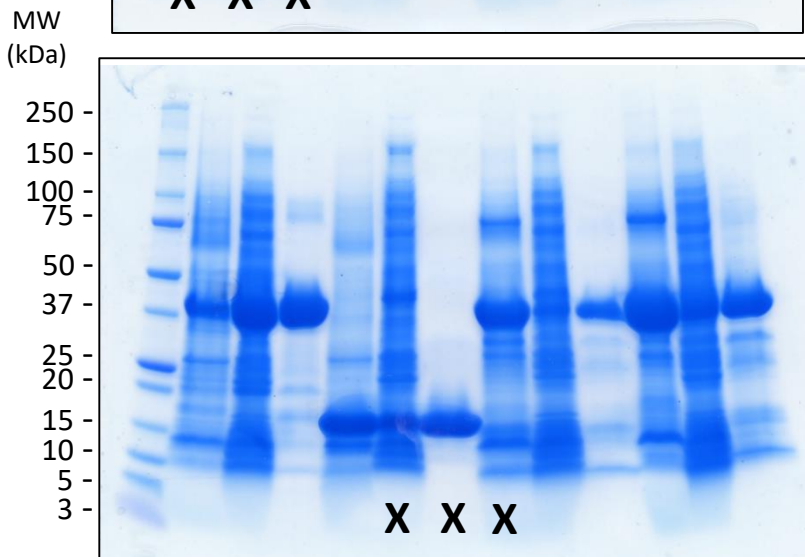

Coomassie gel  
(office scanner)

# S14 Fig, panel A

WB (BioRad imager)

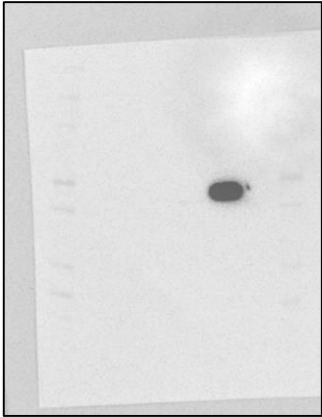

WB (BioRad imager)

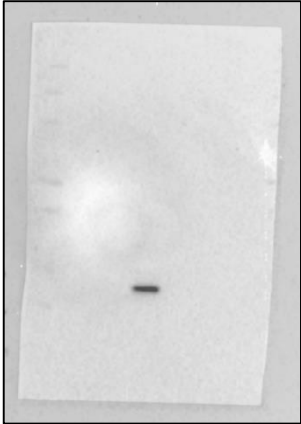

MW (kDa) Ponceau (BioRad imager)

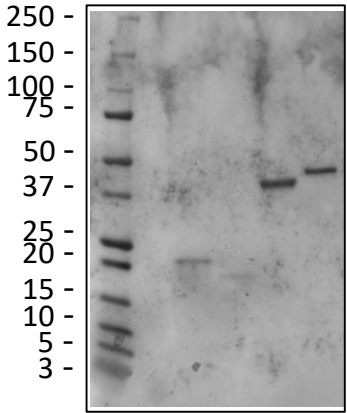

MW (kDa) Ponceau (BioRad imager)

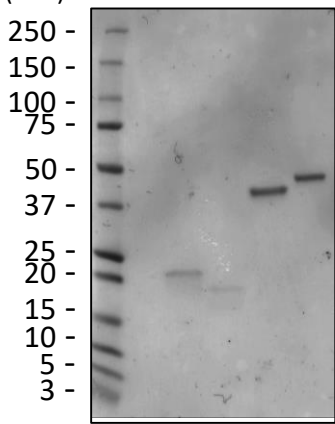

# S14 Fig, panel B

WB (BioRad imager)

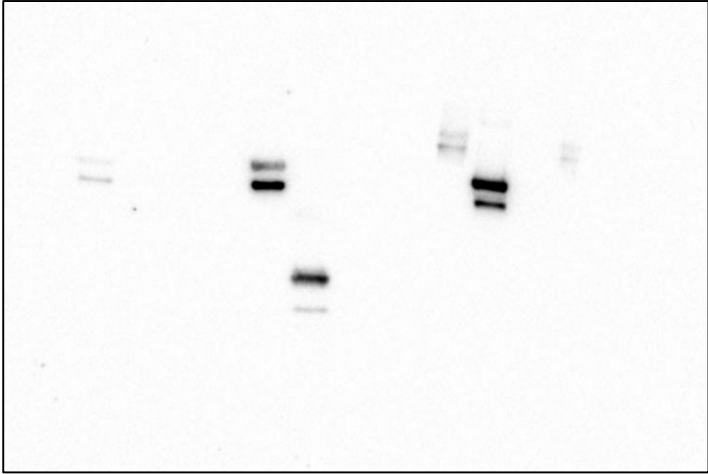

Ponceau (office scanner)

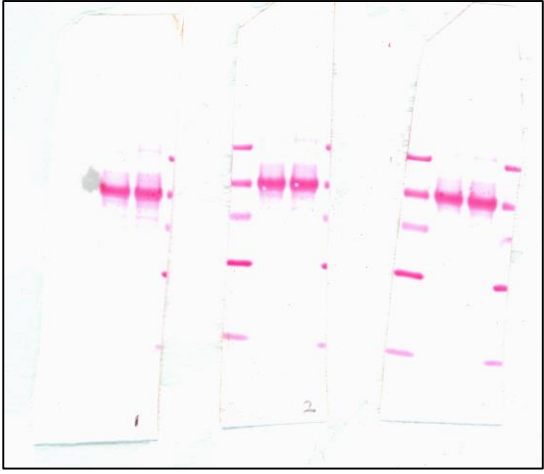

Supplement: pone.0284453.s018.pdf [file pone.0284453.s018.pdf]
