# Supplementary material for: Obscurin Rho GEF domains are phosphorylated by MST-family kinases but do not exhibit nucleotide exchange factor activity towards Rho GTPases in vitro
Source: PubMed Central journal article supplement (PMC10118190; doi:10.1371/journal.pone.0284453), 2023-04-20
Supplement: pone.0284453.s020.pdf [file pone.0284453.s020.pdf]

## Info Sheet KinaseFinder

(Version 16)

### ***Purpose of the KinaseFinder Service***

***The KinaseFinder Service is intended to identify protein kinases, which accept a given test sample (protein or biotinylated peptide) as a substrate in ProQinase's radiometric <sup>33</sup>PanQinase® Assay.***

## **1. Submission of Test Samples**

### **1.1 Protein Samples**

Please provide the indicated volumes of a 1 mg/ml stock solution in H<sub>2</sub>O or 50 mM HEPES, pH 7.5. Glycerol up to 10%, beta-mercaptoethanol/DTT up to 5 mM and NaCl up to 300 mM are tolerable. The buffer must not contain detergents or imidazole above 50 mM since these will interfere with the assay. If your test sample is not soluble in aqueous solution please contact us. We recommend to ship samples on dry ice to avoid damage of the proteins during transport.

Primary screening will be performed at 5 µg/50 µl sample assay concentration (100 µg/ml).

Hit confirmation will be performed at 2.5 µg/50 µl, 5 µg/50 µl and 10 µg/50 µl sample assay concentration.

*Please note:* The sample(s) may be returned at customer's expense. From the date of report, the sample(s) will be stored at -20° Celsius for 6 months and will then be discarded without further notice.

KinaseFinder with 1 assay plate (Tyr version):

- 1 ml ⇒ primary hit finding and hit confirmation with max. 3 hits
- 1.5 ml ⇒ primary hit finding and hit confirmation with max. 7 hits

KinaseFinder with 3 assay plates (Ser/Thr version):

- 2.40 ml ⇒ primary hit finding and hit confirmation with max. 3 hits
- 3.25 ml ⇒ primary hit finding and hit confirmation with max. 7 hits

KinaseFinder with 4 assay plates (complete version):

- 3.25 ml ⇒ primary hit finding and hit confirmation with max. 3 hits
- 3.75 ml ⇒ primary hit finding and hit confirmation with max. 7 hits

### **Protein stock solutions of other concentrations:**

Primary screening will be performed at a sample assay concentration 10 fold lower than the provided sample stock solution concentration.

Hit confirmation will be performed at sample assay concentrations 20-fold, 10-fold and 5-fold lower than the sample stock solution concentration.

### **1.2 Biotinylated Peptide Samples**

Please provide a 200  $\mu\text{M}$  stock solution of the biotinylated peptide, depending on the assay setup, see section 2) in  $\text{H}_2\text{O}$  or 50 mM HEPES, pH 7.5. If your test sample is not soluble in aqueous solution please contact us. Volumes required are a tenth of the volumes indicated above for protein test samples. We recommend to ship samples on dry ice to avoid damage of the peptides during transport.

Primary screening will be performed at 1  $\mu\text{M}$  sample assay concentration.

Hit confirmation will be performed at 1  $\mu\text{M}$ , 0.5  $\mu\text{M}$  and 0.25  $\mu\text{M}$  sample assay concentration.

*Please note:* The sample(s) may be returned at customer's expense. From the date of report, the sample(s) will be stored at  $-20^\circ$  Celsius for 6 months and will then be discarded without further notice.

### **Peptide stock solutions of other concentrations:**

Primary screening will be performed at a sample assay concentration which is 200-fold lower than the sample stock solution concentration.

Hit confirmation will be performed at a sample assay concentration which is 200-fold, 400-fold and 800-fold lower than the sample stock solution concentration.

**Please note: Testing of biotinylated peptides above 1  $\mu\text{M}$  assay concentration is not possible, due to the limited binding capacity of the streptavidine-coated HTS Plus FlashPlates.**

## **2. Assay Conditions**

The KinaseFinder experiments are performed with a radiometric filter plate assay (protein samples) or a radiometric assay based on streptavidin-coated FlashPlate<sup>®</sup> HTS PLUS plates (biotinylated peptide samples).

## 2.1 Phosphorylation reaction

The samples are tested against each kinase in singlicate in a 96-well polypropylene microtiter plate in a 50 µl reaction volume. The reaction cocktail is pipetted in the following order:

- 10 µl of kinase
- 40 µl of buffer/ATP/test sample mixture

The reaction cocktail contains 60 mM HEPES-NaOH, pH 7.5, 3 mM MgCl<sub>2</sub>, 3 mM MnCl<sub>2</sub>, 3 µM Na-orthovanadate, 1.2 mM DTT, 1 µM ATP/[γ-<sup>33</sup>P]-ATP (approx. 7.5 x 10<sup>5</sup> cpm per well), protein kinase (1-300 ng/50µl, according to the <sup>33</sup>PanKinase<sup>®</sup> screening assay concentration of the respective kinase/kinase lot) and the protein/peptide of interest.

All PKC assays (except the PKC-mu and the PKC-nu assay) additionally contained 1 mM CaCl<sub>2</sub>, 4 mM EDTA, 5 µg/ml Phosphatidylserine and 1 µg/ml 1,2-Dioleoyl-glycerol.

The CAMK1D, CAMK2A, CAMK2B, CAMK2D, CAMK4, CAMKK1, CAMKK2, DAPK2, EEF2K, MYLK, MYLK2 and MYLK3 assays additionally contained 1 µg/ml Calmodulin and 0.5 mM CaCl<sub>2</sub>.

The PRKG1 and PRKG2 assays additionally contained 1 µM cGMP.

The DNA-PK assay additionally contained 2.5 µg/ml DNA.

The reaction cocktails are incubated at 30° C for 60 minutes.

Subsequently, depending on the type of test sample (protein or biotinylated peptide), the reaction cocktails are processed differently (see below).

## 2.2 Detection of phosphorylated proteins

Reaction cocktails with a protein or peptide as potential substrate are stopped with 20 µl of 10% (v/s) H<sub>3</sub>PO<sub>4</sub>. Subsequently, the reaction cocktails are transferred to pre-wetted 96-well filter plates (Millipore MSFC glass filter), followed by 10 min incubation at room temperature. Subsequently, the plates are washed three times with 250 µl of 150 mM H<sub>3</sub>PO<sub>4</sub> and once with 20 µl of 100% ethanol. After drying the plates for 30 min at 40° C, 50 µl of scintillator are added and incorporation of <sup>33</sup>P<sub>i</sub> ("counting of cpm") is determined with a microplate scintillation counter.

## 2.3 Detection of phosphorylated, biotinylated peptides

Reaction cocktails with a biotinylated peptide are stopped with 20 µl of 4.7 M NaCl/35 mM EDTA. Subsequently, the reaction cocktails are transferred to streptavidin-coated FlashPlate<sup>®</sup> HTS PLUS plates followed by 30 min incubation at room temperature on a shaker. Then, the plates are washed three times with 250 µl of 0.9% NaCl. Incorporation of <sup>33</sup>P<sub>i</sub> ("counting of cpm") is determined with a microplate scintillation counter.

### **3. Evaluation of Raw Data**

For evaluation of the results of the filter assay (testing of protein or peptide test samples), kinase autophosphorylation has previously been determined in three independent experiments and a mean autophosphorylation value has been calculated for each kinase. These values (normalized on the radioactivity input of the current experiment) are subtracted from the corresponding raw data obtained with each kinase. Moreover, the median of three background values (sample protein without enzyme) is subtracted from the raw data.

For evaluation of the results from the streptavidin-coated FlashPlate® HTS PLUS plate assay, the activity value (raw counts of the kinase assay plus biotinylated sample peptide as measured in the FlashPlate® HTS PLUS plate assay), the corresponding kinase background value (kinase w/o sample peptide) and the median of three background values of the sample peptide (sample peptide w/o enzyme) are measured. The median of three background values is subtracted from the raw data of the results of the testings of biotinylated sample peptide plus kinase.

### **4. Hit confirmation**

Hits detected in a KinaseFinder experiment can be verified in a hit confirmation experiment, where the test sample will be tested at three different concentrations in triplicate (see section 1.1 and 1.2) at enzyme concentrations according to the standard <sup>33</sup>PanQinase® screening assay concentration of the respective kinase/kinase lot.

### **5. Protein Kinases**

All kinases currently available for the KinaseFinder Service are listed on the following pages.

## 5.1 Ser/Thr Kinases

| No. | Kinase Name | No. | Kinase Name      | No. | Kinase Name           | No. | Kinase Name  |
|-----|-------------|-----|------------------|-----|-----------------------|-----|--------------|
| 1   | ACV-R1      | 63  | COT              | 125 | MEK2                  | 187 | PKMYT1       |
| 2   | ACV-R1B     | 64  | DAPK1            | 126 | MEK5                  | 188 | PKN3         |
| 3   | ACV-R2A     | 65  | DAPK2            | 127 | MEKK2                 | 189 | PLK1         |
| 4   | ACV-R2B     | 66  | DAPK3            | 128 | MEKK3                 | 190 | PLK3         |
| 5   | ACV-RL1     | 67  | DCAMKL2          | 129 | MELK                  | 191 | PRK1         |
| 6   | AKT1        | 68  | DMPK             | 130 | MINK1                 | 192 | PRK2         |
| 7   | AKT2        | 69  | DNA-PK           | 131 | MKK4                  | 193 | PRKD2        |
| 8   | AKT3        | 70  | DYRK1A           | 132 | MKK6SDTD              | 194 | PRKG1        |
| 9   | AMPK-alpha1 | 71  | DYRK1B           | 133 | MKK7                  | 195 | PRKG2        |
| 10  | ARK5        | 72  | DYRK2            | 134 | MKNK1                 | 196 | PRKX         |
| 11  | ASK1        | 73  | DYRK3            | 135 | MKNK2                 | 197 | RAF1 YDYD    |
| 12  | Aurora-A    | 74  | DYRK4            | 136 | MLK4                  | 198 | RIPK2        |
| 13  | Aurora-B    | 75  | EEF2K            | 137 | MST1                  | 199 | RIPK5        |
| 14  | Aurora-C    | 76  | EIF2AK2          | 138 | MST2                  | 200 | ROCK1        |
| 15  | BMPR1A      | 77  | EIF2AK3          | 139 | MST3                  | 201 | ROCK2        |
| 16  | B-RAF VE    | 78  | ERK1             | 140 | MST4                  | 202 | RPS6KA1      |
| 17  | B-RAF wt    | 79  | ERK2             | 141 | mTOR                  | 203 | RPS6KA2      |
| 18  | BRSK1       | 80  | ERK7             | 142 | MYLK                  | 204 | RPS6KA3      |
| 19  | BRSK2       | 81  | GRK2             | 143 | MYLK2                 | 205 | RPS6KA4      |
| 20  | BUB1B       | 82  | GRK3             | 144 | MYLK3                 | 206 | RPS6KA5      |
| 21  | CAMK1D      | 83  | GRK4             | 145 | NEK1                  | 207 | RPS6KA6      |
| 22  | CAMK2A      | 84  | GRK5             | 146 | NEK11                 | 208 | S6K          |
| 23  | CAMK2B      | 85  | GRK6             | 147 | NEK2                  | 209 | S6K-beta     |
| 24  | CAMK2D      | 86  | GRK7             | 148 | NEK3                  | 210 | SAK          |
| 25  | CAMK2G      | 87  | GSG2             | 149 | NEK4                  | 211 | SGK1         |
| 26  | CAMK4       | 88  | GSK3-alpha       | 150 | NEK6                  | 212 | SGK2         |
| 27  | CAMKK1      | 89  | GSK3-beta        | 151 | NEK7                  | 213 | SGK3         |
| 28  | CAMKK2      | 90  | HIPK1            | 152 | NEK9                  | 214 | SIK1 aa1-350 |
| 29  | CDC42BPA    | 91  | HIPK2            | 153 | NIK                   | 215 | SIK2         |
| 30  | CDC42BPB    | 92  | HIPK3            | 154 | NLK                   | 216 | SLK          |
| 31  | CDC7/ASK    | 93  | HIPK4            | 155 | p38-alpha             | 217 | SNARK        |
| 32  | CDK1/CycA   | 94  | HRI              | 156 | p38-beta              | 218 | SNK          |
| 33  | CDK1/CycE   | 95  | IKK-alpha        | 157 | p38-delta             | 219 | SRPK1        |
| 34  | CDK16/CycK  | 96  | IKK-beta         | 158 | p38-gamma             | 220 | SRPK2        |
| 35  | CDK1CycB1   | 97  | IKK-epsilon      | 159 | PAK1                  | 221 | STK17A       |
| 36  | CDK2/CycA   | 98  | IRAK1            | 160 | PAK2                  | 222 | STK23        |
| 37  | CDK2/CycE   | 99  | IRAK4            | 161 | PAK3                  | 223 | STK25        |
| 38  | CDK3/CycE   | 100 | JNK1             | 162 | PAK4                  | 224 | STK33        |
| 39  | CDK4/CycD1  | 101 | JNK2             | 163 | PAK6                  | 225 | STK39        |
| 40  | CDK4/CycD3  | 102 | JNK3             | 164 | PAK7                  | 226 | TAOK2        |
| 41  | CDK5/p25NCK | 103 | LIMK1            | 165 | PASK                  | 227 | TAOK3        |
| 42  | CDK5/p35NCK | 104 | LIMK2            | 166 | PBK                   | 228 | TBK1         |
| 43  | CDK6/CycD1  | 105 | LRRK G2019S      | 167 | PDK1                  | 229 | TGFB-R1      |
| 44  | CDK6/CycD3  | 106 | LRRK2 I2020T     | 168 | PHKG1                 | 230 | TGFB-R2      |
| 45  | CDK7CycH    | 107 | LRRK2 R1441C     | 169 | PHKG2                 | 231 | TLK1         |
| 46  | CDK8/CycC   | 108 | LRRK2 wt         | 170 | PIM1                  | 232 | TLK2         |
| 47  | CDK9/CycK   | 109 | MAP3K1           | 171 | PIM2                  | 233 | TSF1         |
| 48  | CDK9/CycT   | 110 | MAP3K10          | 172 | PIM3                  | 234 | TSK2         |
| 49  | CHK1        | 111 | MAP3K11          | 173 | PKA                   | 235 | TSSK1        |
| 50  | CHK2        | 112 | MAP3K7/MAP3K7IP1 | 174 | PKC-alpha             | 236 | TTBK1        |
| 51  | CK1-alpha1  | 113 | MAP3K9           | 175 | PKC-beta1             | 237 | TTBK2        |
| 52  | CK1-delta   | 114 | MAP4K2           | 176 | PKC-beta2             | 238 | TTK          |
| 53  | CK1-epsilon | 115 | MAP4K4           | 177 | PKC-delta             | 239 | VRK1         |
| 54  | CK1-gamma1  | 116 | MAP4K5           | 178 | PKC-epsilon           | 240 | VRK2         |
| 55  | CK1-gamma2  | 117 | MAPKAPK2         | 179 | PKC-eta               | 241 | WEE1         |
| 56  | CK1-gamma3  | 118 | MAPKAPK3         | 180 | PKC-gamma             | 242 | WNK1         |
| 57  | CK2-alpha1  | 119 | MAPKAPK5         | 181 | PKC-iota              | 243 | WNK2         |
| 58  | CK2-alpha2  | 120 | MARK1            | 182 | PKC-mu                | 244 | WNK3         |
| 59  | CLK1        | 121 | MARK2            | 183 | PKC-nu                | 245 | ZAK          |
| 60  | CLK2        | 122 | MARK3            | 184 | PKC-theta             |     |              |
| 61  | CLK3        | 123 | MARK4            | 185 | PKC-zeta              |     |              |
| 62  | CLK4        | 124 | MEK1 wt          | 186 | PKC-zeta wt aa184-592 |     |              |

## 5.2 Tyr Kinases

| No. | Kinase Name              | No. | Kinase Name       |
|-----|--------------------------|-----|-------------------|
| 1   | ABL1 T315I               | 63  | MERTK             |
| 2   | ABL1 wt                  | 64  | MET T1250M        |
| 3   | ABL2                     | 65  | MET wt            |
| 4   | ACK1                     | 66  | MET Y1235D        |
| 5   | ALK F1174L (GST-HIS-tag) | 67  | MUSK              |
| 6   | ALK L1196M (GST-HIS-tag) | 68  | PDGFR-alpha D842V |
| 7   | ALK wt                   | 69  | PDGFR-alpha wt    |
| 8   | AXL                      | 70  | PDGFR-beta        |
| 9   | BLK                      | 71  | PYK2              |
| 10  | BMX                      | 72  | RET V804M         |
| 11  | BRK                      | 73  | RET wt            |
| 12  | BTK                      | 74  | RON               |
| 13  | CSF1-R                   | 75  | ROS               |
| 14  | CSK                      | 76  | SRC               |
| 15  | DDR2 T654M               | 77  | SRMS              |
| 16  | DDR2 wt                  | 78  | SYK               |
| 17  | EGF-R T790M              | 79  | TEC               |
| 18  | EGF-R wt                 | 80  | TIE2 wt           |
| 19  | EPHA1                    | 81  | TIE2 Y897S        |
| 20  | EPHA2                    | 82  | TNK1              |
| 21  | EPHA3                    | 83  | TRK-A             |
| 22  | EPHA4                    | 84  | TRK-B             |
| 23  | EPHA5                    | 85  | TRK-C             |
| 24  | EPHA6                    | 86  | TXK               |
| 25  | EPHA7                    | 87  | TYK2              |
| 26  | EPHA8                    | 88  | TYRO3             |
| 27  | EPHB1                    | 89  | VEGF-R1           |
| 28  | EPHB2                    | 90  | VEGF-R2           |
| 29  | EPHB3                    | 91  | VEGF-R3           |
| 30  | EPHB4                    | 92  | WEE1              |
| 31  | ERBB2 wt                 | 93  | YES               |
| 32  | ERBB4                    | 94  | ZAP70             |
| 33  | FAK                      |     |                   |
| 34  | FER                      |     |                   |
| 35  | FES                      |     |                   |
| 36  | FGF-R1 V561M             |     |                   |
| 37  | FGF-R1 wt                |     |                   |
| 38  | FGF-R2                   |     |                   |
| 39  | FGF-R3 K650E             |     |                   |
| 40  | FGF-R3 wt                |     |                   |
| 41  | FGF-R4                   |     |                   |
| 42  | FGR                      |     |                   |
| 43  | FLT3 D835Y               |     |                   |
| 44  | FLT3 ITD                 |     |                   |
| 45  | FLT3 wt                  |     |                   |
| 46  | FRK                      |     |                   |
| 47  | FYN                      |     |                   |
| 48  | HCK                      |     |                   |
| 49  | IGF1-R                   |     |                   |
| 50  | INS-R                    |     |                   |
| 51  | INSR-R                   |     |                   |
| 52  | ITK                      |     |                   |
| 53  | JAK1                     |     |                   |
| 54  | JAK2                     |     |                   |
| 55  | JAK3                     |     |                   |
| 56  | KIT D816V                |     |                   |
| 57  | KIT T670I                |     |                   |
| 58  | KIT wt                   |     |                   |
| 59  | LCK                      |     |                   |
| 60  | LTK                      |     |                   |
| 61  | LYN                      |     |                   |
| 62  | MATK                     |     |                   |
